# Supplementary material for: Genomic Signatures of Domestication Selection in the Australasian Snapper (Chrysophrys auratus)
Source: MDPI journal article supplement (doi:10.3390/genes12111737), 2021-10-29
Supplement: s1 [file s1]

### Supplementary Materials

**Supplementary Table S1:** This table contains SNP variants detected as outliers in the comparison between the F<sub>0</sub> and F<sub>1</sub> cohorts that had genes in proximity. It shows the chromosome the SNP variant was found, its position on the chromosome, the methods that detected it and the name of the gene found in proximity to it.

| Chromosome | Bp       | Method | Gene name      |
|------------|----------|--------|----------------|
| LG1        | 21204878 | XP-EHH | zgc:66447      |
| LG1        | 21204878 | XP-EHH | slc25a51b      |
| LG5        | 1026005  | XP-EHH | pik3r4         |
| LG5        | 1027241  | XP-EHH | pik3r4         |
| LG5        | 1026005  | XP-EHH | atp2c1         |
| LG5        | 1027241  | XP-EHH | atp2c1         |
| LG8        | 16240409 | XP-EHH | dlx2a          |
| LG8        | 16246615 | XP-EHH | dlx2a          |
| LG8        | 16240409 | XP-EHH | dlx1a          |
| LG8        | 16246615 | XP-EHH | dlx1a          |
| LG8        | 6330019  | XP-EHH | wars2          |
| LG8        | 6330019  | XP-EHH | tbx15          |
| LG20       | 25449832 | XP-EHH | cavin4b        |
| LG20       | 25449832 | XP-EHH | dnah5l         |
| LG20       | 25449832 | XP-EHH | CABZ01038521.1 |
| LG21       | 12457761 | LFMM   | CABZ01065423.1 |
| LG21       | 22721575 | LFMM   | actr10         |

**Supplementary Table S2:** This table contains SNP variants detected as outliers in the comparison between the F<sub>1</sub> and F<sub>2</sub> cohorts that had genes in proximity. It shows the chromosome the SNP variant was found, its position on the chromosome, the methods that detected it and the name of the gene found in proximity to it.

| Chromosome | Bp       | Method         | Gene name        |
|------------|----------|----------------|------------------|
| LG21       | 22721575 | LFMM           | pgfb             |
| LG22       | 1816828  | XP-EHH         | cntnap3          |
| LG24       | 7259569  | LFMM, Bayescan | spry2            |
| LG2        | 24437692 | Bayescan       | cast             |
| LG7        | 9634521  | LFMM           | mef2b            |
| LG7        | 9634521  | LFMM           | tnmem161a        |
| LG7        | 9634521  | LFMM           | tnmem161b        |
| LG8        | 25251189 | LFMM           | asic4a           |
| LG8        | 25252407 | LFMM, Bayescan | asic4a           |
| LG9        | 5256852  | LFMM           | frmd6            |
| LG10       | 1227444  | LFMM, Bayescan | dock5            |
| LG10       | 1227444  | LFMM, Bayescan | dock1            |
| LG10       | 3925004  | Bayescan       | emid1            |
| LG18       | 20734942 | XP-EHH         | emid1            |
| LG18       | 20745147 | XP-EHH         | emid1            |
| LG10       | 4477035  | LFMM           | PITPNM2          |
| LG10       | 4477035  | LFMM           | pitpnm3          |
| LG18       | 25091357 | XP-EHH         | pitpnm3          |
| LG10       | 4477035  | LFMM           | plrdgb           |
| LG18       | 25091357 | XP-EHH         | plrdgb           |
| LG11       | 1610091  | LFMM           | herc1            |
| LG11       | 2816662  | XP-EHH         | herc1            |
| LG11       | 1610091  | LFMM           | si:ch211-112g6.4 |
| LG11       | 1610091  | LFMM           | dapk2b           |
| LG11       | 1610091  | LFMM           | dapk2a           |
| LG11       | 20299883 | LFMM           | epha6            |
| LG11       | 20299883 | LFMM           | EPHB3            |
| LG11       | 20299883 | LFMM           | AL954670.1       |
| LG11       | 20299883 | LFMM           | arl6             |
| LG11       | 20299883 | LFMM           | ephb2a           |
| LG11       | 20616751 | LFMM           | tmco3            |
| LG11       | 20616751 | LFMM           | dcun1d2a         |
| LG11       | 2743034  | Bayescan       | anxa2a           |
| LG11       | 2743034  | Bayescan       | ftr67            |
| LG11       | 2816662  | XP-EHH         | znf395a          |
| LG11       | 2816662  | XP-EHH         | trpm1a           |
| LG11       | 35883595 | LFMM           | adamts17         |
| LG12       | 11382117 | LFMM           | p3h4             |
| LG12       | 11382117 | LFMM           | nt5c3a           |
| LG12       | 11382117 | LFMM           | fkbp10b          |
| LG12       | 11382117 | LFMM           | fkbp9            |
| LG12       | 11382117 | LFMM           | adam11           |
| LG15       | 1434167  | LFMM           | sec31a           |
| LG16       | 21888792 | XP-EHH         | fgfr4            |
| LG16       | 22376561 | Bayescan       | ik               |

|             |                |                |                    |
|-------------|----------------|----------------|--------------------|
| LG16        | 22376561       | Bayescan       | ndufa2             |
| LG16        | 23333339       | LFMM           | cadm1b             |
| LG16        | 23333339       | LFMM           | cadm1a             |
| LG18        | 20374531       | XP-EHH         | qpctla             |
| LG18        | 20374531       | XP-EHH         | qpctlb             |
| LG18        | 20374531       | XP-EHH         | rrm1               |
| LG18        | 20374531       | XP-EHH         | six9               |
| LG18        | 20734942       | XP-EHH         | lxn                |
| LG18        | 20734942       | XP-EHH         | wdr53              |
| LG18        | 20745147       | XP-EHH         | wdr53              |
| LG18        | 20734942       | XP-EHH         | srprb              |
| LG18        | 20745147       | XP-EHH         | srprb              |
| LG18        | 20745147       | XP-EHH         | emilin2a           |
| LG18        | 21265383       | XP-EHH         | schip1             |
| LG18        | 21272263       | XP-EHH         | schip1             |
| LG18        | 21289146       | XP-EHH         | schip1             |
| LG18        | 21459203       | XP-EHH         | si:dkey-6n21.13    |
| LG18        | 21459203       | XP-EHH         | p2ry1              |
| LG18        | 21459203       | XP-EHH         | mfsd1              |
| LG18        | 23112187       | XP-EHH         | thap12b            |
| LG18        | 23112187       | XP-EHH         | map6b              |
| LG18        | 23112187       | XP-EHH         | dyrk1ab            |
| LG18        | 25445239       | XP-EHH         | traf4a             |
| LG18        | 29888560       | LFMM           | hnrnpl             |
| LG18        | 29888560       | LFMM           | irf2bp1            |
| LG18        | 29888560       | LFMM           | cd3eap             |
| LG18        | 29888560       | LFMM           | irf2bpl            |
| LG18        | 6852727        | LFMM, Bayescan | si:ch73-265h17.1   |
| LG18        | 6852727        | LFMM, Bayescan | si:ch73-265h17.2   |
| <b>LG19</b> | <b>3350723</b> | <b>XP-EHH</b>  | <b>elac2</b>       |
| <b>LG19</b> | <b>3357023</b> | <b>XP-EHH</b>  | <b>elac2</b>       |
| <b>LG19</b> | <b>3365779</b> | <b>XP-EHH</b>  | <b>elac2</b>       |
| <b>LG19</b> | <b>3367929</b> | <b>XP-EHH</b>  | <b>elac2</b>       |
| <b>LG19</b> | <b>3365779</b> | <b>XP-EHH</b>  | <b>map2k4a</b>     |
| <b>LG19</b> | <b>3367929</b> | <b>XP-EHH</b>  | <b>map2k4a</b>     |
| <b>LG19</b> | <b>3365779</b> | <b>XP-EHH</b>  | <b>map2k4b</b>     |
| <b>LG19</b> | <b>3367929</b> | <b>XP-EHH</b>  | <b>map2k4b</b>     |
| LG19        | 4377093        | XP-EHH         | tbcd               |
| LG19        | 4377093        | XP-EHH         | fn3krp             |
| LG19        | 4377093        | XP-EHH         | epn3a              |
| LG19        | 4377093        | XP-EHH         | epn3b              |
| LG19        | 4377093        | XP-EHH         | arl16              |
| LG19        | 4377093        | XP-EHH         | znf750             |
| LG21        | 9596988        | XP-EHH         | fmn2b              |
| LG21        | 9596988        | XP-EHH         | si:ch1073-209e23.1 |
| LG21        | 9596988        | XP-EHH         | scg5               |
| LG21        | 9596988        | XP-EHH         | grem1a             |
| LG21        | 9596988        | XP-EHH         | fmn1               |
| LG21        | 9596988        | XP-EHH         | CU695215.3         |
| LG21        | 9635562        | XP-EHH         | ryr3               |

|             |                 |               |                   |
|-------------|-----------------|---------------|-------------------|
| LG21        | 9703594         | XP-EHH        | ryr3              |
| LG21        | 9706219         | XP-EHH        | ryr3              |
| LG21        | 9706219         | XP-EHH        | RYR2              |
| LG22        | 11438258        | XP-EHH        | si:ch211-194e18.2 |
| LG22        | 11438258        | XP-EHH        | AL831730.1        |
| LG22        | 11438258        | XP-EHH        | cfap36            |
| <b>LG22</b> | <b>20343783</b> | <b>XP-EHH</b> | <b>nsmce4a</b>    |
| <b>LG22</b> | <b>20356187</b> | <b>XP-EHH</b> | <b>nsmce4a</b>    |
| <b>LG22</b> | <b>20343783</b> | <b>XP-EHH</b> | <b>tnmem63bb</b>  |
| <b>LG22</b> | <b>20343783</b> | <b>XP-EHH</b> | <b>CU695232.1</b> |
| LG22        | 7176199         | XP-EHH        | cfap43            |
| LG22        | 7186310         | XP-EHH        | cfap43            |
| LG22        | 7176199         | XP-EHH        | sfr1              |
| LG22        | 7186310         | XP-EHH        | sfr1              |
| <b>LG22</b> | <b>7199122</b>  | <b>XP-EHH</b> | <b>col17a1b</b>   |
| <b>LG22</b> | <b>7210194</b>  | <b>XP-EHH</b> | <b>col17a1b</b>   |
| <b>LG22</b> | <b>7215730</b>  | <b>XP-EHH</b> | <b>col17a1b</b>   |
| <b>LG22</b> | <b>7199122</b>  | <b>XP-EHH</b> | <b>col17a1a</b>   |
| <b>LG22</b> | <b>7210194</b>  | <b>XP-EHH</b> | <b>col17a1a</b>   |
| <b>LG22</b> | <b>7199122</b>  | <b>XP-EHH</b> | <b>slka</b>       |
| <b>LG22</b> | <b>7210194</b>  | <b>XP-EHH</b> | <b>slka</b>       |
| <b>LG22</b> | <b>7215730</b>  | <b>XP-EHH</b> | <b>slka</b>       |
| LG22        | 7210194         | XP-EHH        | slkb              |
| LG22        | 7215730         | XP-EHH        | slkb              |
| LG23        | 14331052        | LFMM          | khynyn            |
| LG23        | 14331052        | LFMM          | n4bp1             |
| LG23        | 14331052        | LFMM          | ripk3             |
| LG23        | 14331052        | LFMM          | ripk4             |
| LG23        | 15167698        | LFMM          | tnfsf10l          |

**Supplementary Table S3:** This table contains SNP variants detected as outliers in the comparison between the F<sub>1</sub> and F<sub>2</sub> cohorts that had genes in proximity. It shows the chromosome the SNP variant was found, its position on the chromosome, the methods that detected it and the name of the gene found in proximity to it.

| <b>Chromosome</b> | <b>Bp</b>       | <b>Method</b> | <b>Gene name</b>  |
|-------------------|-----------------|---------------|-------------------|
| LG3               | 10454621        | Bayescan      | neur11aa          |
| LG3               | 27864726        | Bayescan      | cpe               |
| LG3               | 27864726        | Bayescan      | msmo1             |
| LG6               | 6540643         | Bayescan      | hcn4l             |
| LG6               | 6540643         | Bayescan      | hcn2b             |
| LG6               | 6540643         | Bayescan      | CABZ01086574.1    |
| LG11              | 9916362         | Bayescan      | mdga1             |
| LG17              | 21892383        | Bayescan      | BX324233.1        |
| <b>LG19</b>       | <b>3350723</b>  | <b>XP-EHH</b> | <b>elac2</b>      |
| <b>LG19</b>       | <b>3357023</b>  | <b>XP-EHH</b> | <b>elac2</b>      |
| <b>LG19</b>       | <b>3365779</b>  | <b>XP-EHH</b> | <b>elac2</b>      |
| <b>LG19</b>       | <b>3365779</b>  | <b>XP-EHH</b> | <b>map2k4a</b>    |
| <b>LG19</b>       | <b>3365779</b>  | <b>XP-EHH</b> | <b>map2k4b</b>    |
| LG20              | 13163319        | Bayescan      | rnp3              |
| LG21              | 11657718        | Bayescan      | ext1a             |
| LG21              | 11657718        | Bayescan      | ext1b             |
| LG21              | 16908061        | Bayescan      | nhs11b            |
| <b>LG22</b>       | <b>20343783</b> | <b>XP-EHH</b> | <b>nsmce4a</b>    |
| <b>LG22</b>       | <b>20343783</b> | <b>XP-EHH</b> | <b>tmem63bb</b>   |
| <b>LG22</b>       | <b>20343783</b> | <b>XP-EHH</b> | <b>CU695232.1</b> |
| LG22              | 26162226        | Bayescan      | zmiz1a            |
| <b>LG22</b>       | <b>7199122</b>  | <b>XP-EHH</b> | <b>col17a1b</b>   |
| <b>LG22</b>       | <b>7210194</b>  | <b>XP-EHH</b> | <b>col17a1b</b>   |
| <b>LG22</b>       | <b>7199122</b>  | <b>XP-EHH</b> | <b>col17a1a</b>   |
| <b>LG22</b>       | <b>7210194</b>  | <b>XP-EHH</b> | <b>col17a1a</b>   |
| <b>LG22</b>       | <b>7199122</b>  | <b>XP-EHH</b> | <b>slka</b>       |
| <b>LG22</b>       | <b>7210194</b>  | <b>XP-EHH</b> | <b>slka</b>       |
| <b>LG22</b>       | <b>7210194</b>  | <b>XP-EHH</b> | <b>slkb</b>       |

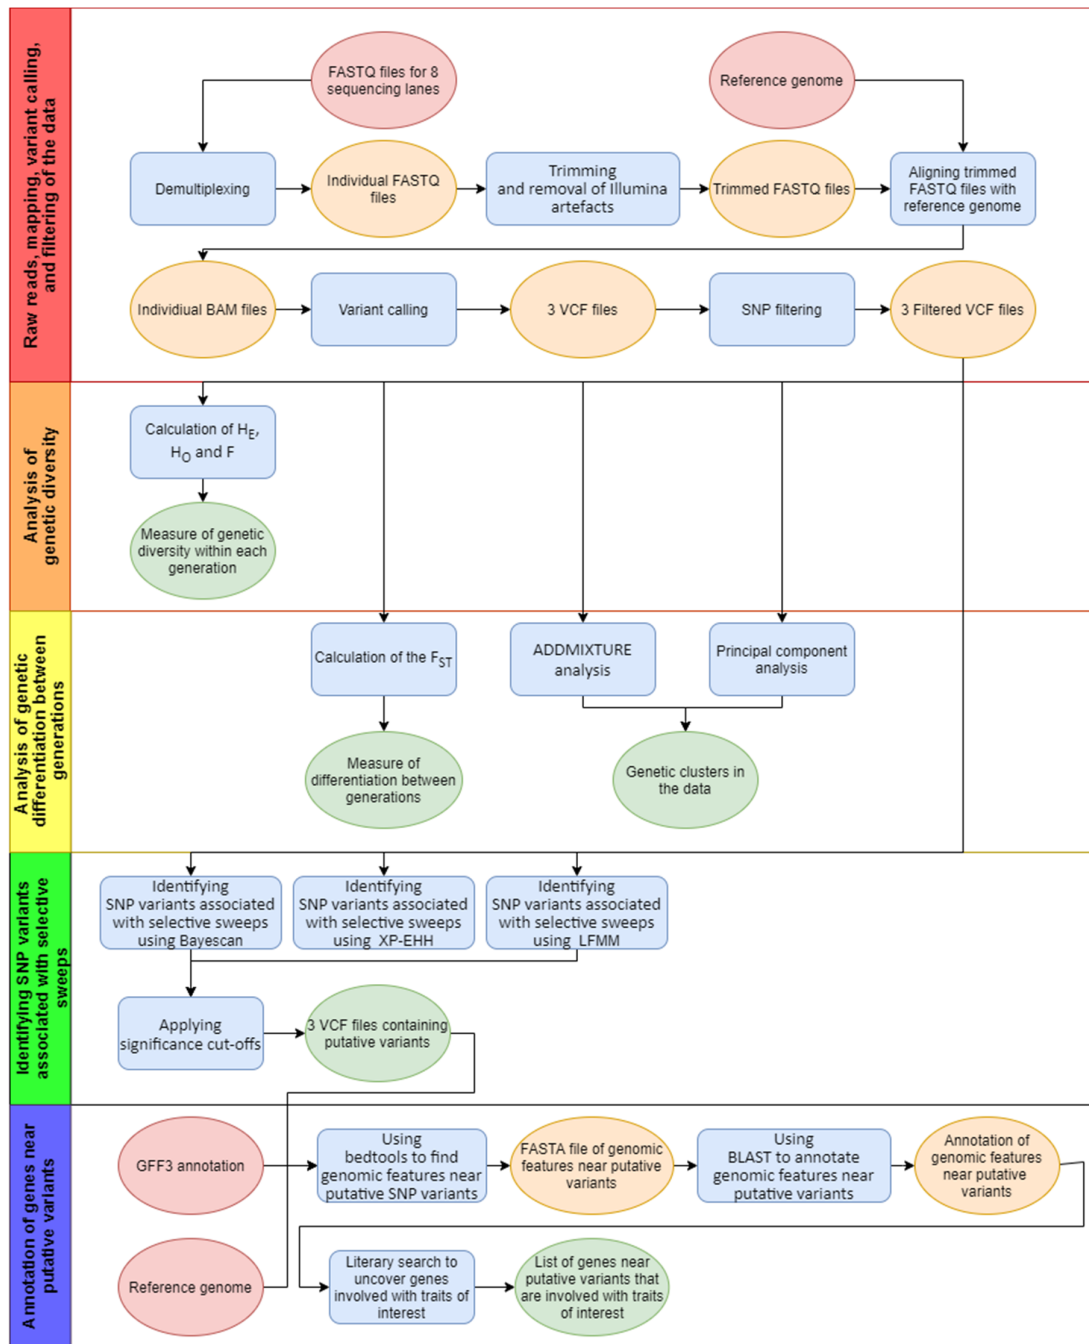

**Supplementary Figure S1:** This Figure shows an overview of the methods used to achieve the project goals. Red circles indicate input data, orange circles indicate intermediate data and green circles indicate a final result that is serves to help fulfil one of the project goals. Finally, blue squares indicate an action or analysis that was performed.

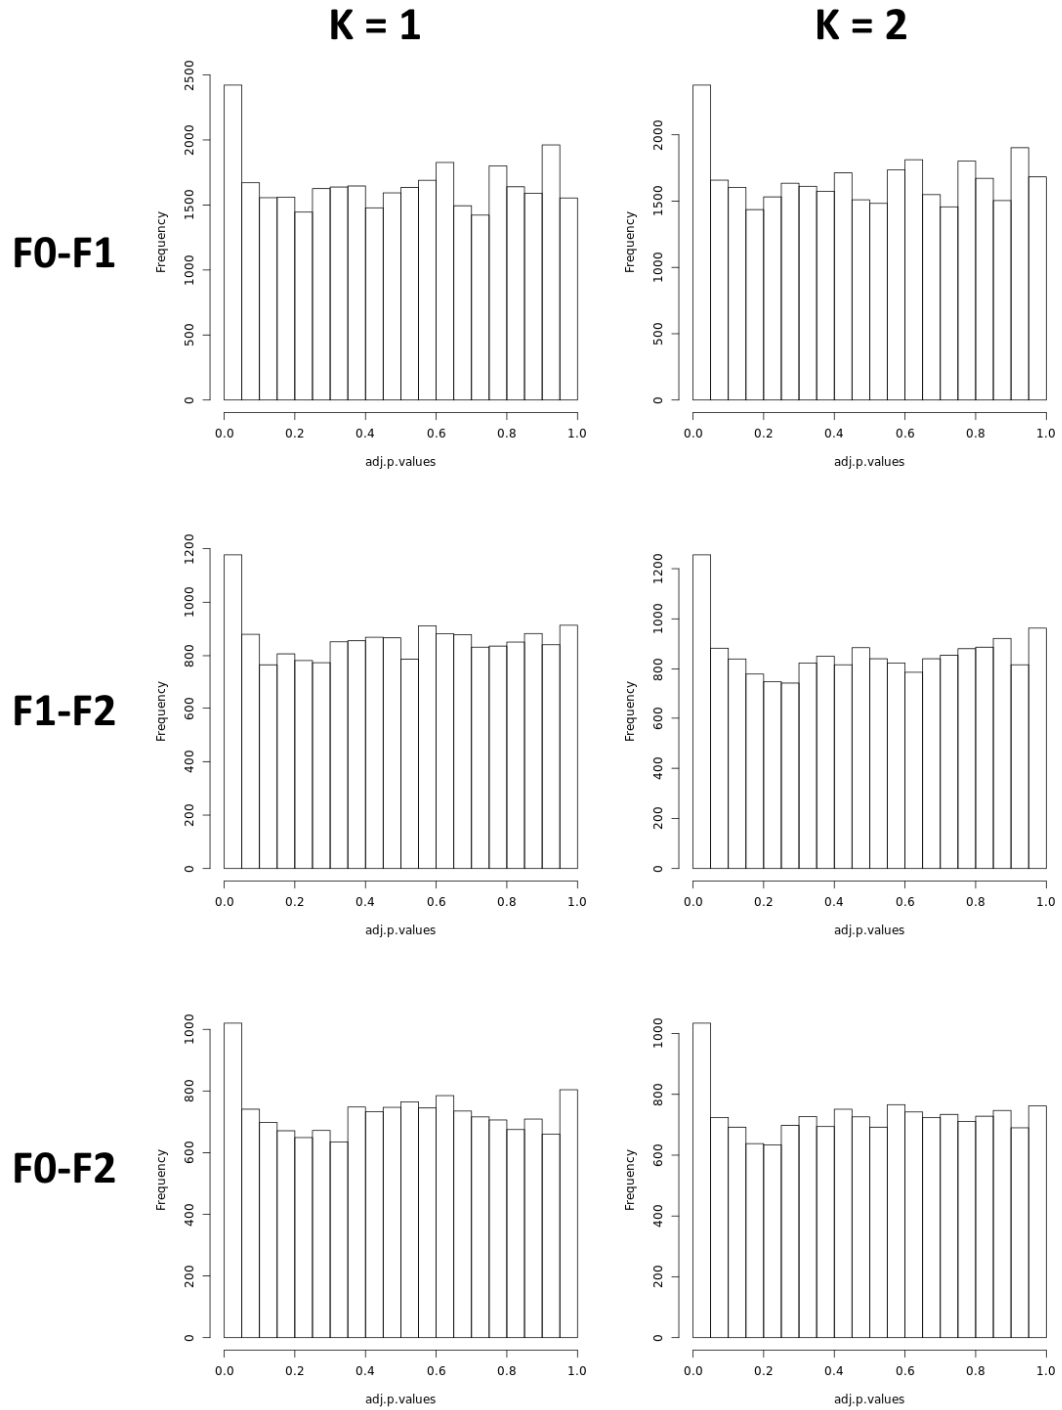

**Supplementary Figure S2:** This figure shows histograms of p-values for runs of LFMM between different comparisons of populations and different values of K. The pattern associated with properly calibrated results is a mostly flat graph, with a peak near 0.0. As can be seen in the graphs, this can be seen both with K = 1 and K = 2. With no Large difference between the two, the value of K = 2 was chosen because of the two cohorts forming the original F<sub>0</sub>.
